# Supplementary material for: Evaluating the behaviour of deep eutectic solvent electrolytes on 2D Ca2C MXene anode for the Li-ion batteries
Source: Royal Society of Chemistry journal article supplement (doi:10.1039/d2cp01155g), 2022-01-01
Supplement: d2cp01155g1.pdf [file d2cp01155g1.pdf]

## Electronic supplementary information

### Evaluating the Behaviour of Deep Eutectic Solvent Electrolytes on 2D Ca<sub>2</sub>C MXene Anode for the Li-Ion Batteries

Tahereh Ghaed-Sharaf,<sup>a</sup> Akbar Omidvar <sup>a\*</sup>

<sup>a</sup> Faculty of Chemistry, Department of Physical Chemistry, University of Isfahan, 81746-73441 Isfahan, Iran

**\*Corresponding Author**

**Akbar Omidvar**

ORCID: 0000-0003-4691-4564

E-mail: [a.omidvar@chem.ui.ac.ir](mailto:a.omidvar@chem.ui.ac.ir)

Phone: +98-3137934924

Fax: +98-3136689732

**Table S1.** Atomic Charges of Li[TFSI]:2TFA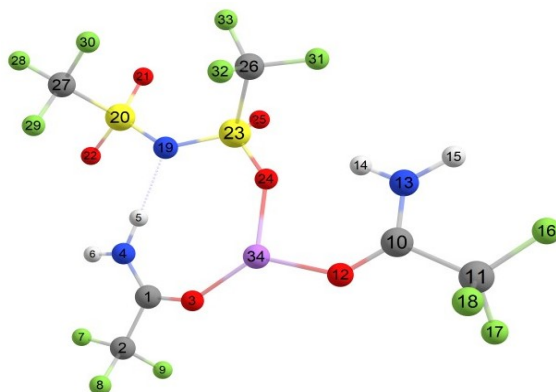

| Atoms | Atomic Number | Charge      |
|-------|---------------|-------------|
| 1     | C             | 0.75513900  |
| 2     | C             | 0.65791300  |
| 3     | O             | -0.74033500 |
| 4     | N             | -0.99033000 |
| 5     | H             | 0.58637100  |
| 6     | H             | 0.43192700  |
| 7     | F             | -0.23570300 |
| 8     | F             | -0.22144200 |
| 9     | F             | -0.22112100 |
| 10    | C             | 0.67254500  |
| 11    | C             | 0.61472300  |
| 12    | O             | -0.65425600 |
| 13    | N             | -0.80188200 |
| 14    | H             | 0.42158900  |
| 15    | H             | 0.38405300  |
| 16    | F             | -0.22846800 |
| 17    | F             | -0.20183200 |
| 18    | F             | -0.20643000 |
| 19    | N             | -0.89624200 |
| 20    | S             | 1.15961400  |
| 21    | O             | -0.51447800 |
| 22    | O             | -0.53594600 |
| 23    | S             | 1.27587600  |
| 24    | O             | -0.78059200 |
| 25    | O             | -0.50632700 |
| 26    | C             | 0.38174000  |
| 27    | C             | 0.35449900  |
| 28    | F             | -0.14082200 |
| 29    | F             | -0.15432600 |
| 30    | F             | -0.11373600 |
| 31    | F             | -0.15863500 |
| 32    | F             | -0.15372900 |
| 33    | F             | -0.13616600 |
| 34    | Li            | 0.89680900  |

**Table S2.** Atomic Charges of Li[TFSI]:4TFA.

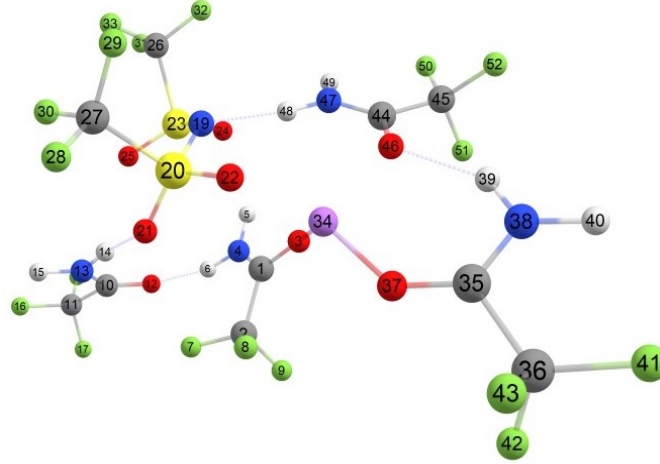

| Atoms | Atomic Number | Charge       |
|-------|---------------|--------------|
| 1     | C             | 0.841096000  |
| 2     | C             | 0.504562000  |
| 3     | O             | -0.742571000 |
| 4     | N             | -0.938602000 |
| 5     | H             | 0.487353000  |
| 6     | H             | 0.488371000  |
| 7     | F             | -0.184122000 |
| 8     | F             | -0.180297000 |
| 9     | F             | -0.226833000 |
| 10    | C             | 0.756786000  |
| 11    | C             | 0.604246000  |
| 12    | O             | -0.664593000 |
| 13    | N             | -0.953525000 |
| 14    | H             | 0.587095000  |
| 15    | H             | 0.381542000  |
| 16    | F             | -0.231345000 |
| 17    | F             | -0.220381000 |
| 18    | F             | -0.214120000 |
| 19    | N             | -0.870456000 |
| 20    | S             | 1.099035000  |
| 21    | O             | -0.651124000 |
| 22    | O             | -0.625642000 |
| 23    | S             | 1.095087000  |
| 24    | O             | -0.570731000 |
| 25    | O             | -0.549299000 |
| 26    | C             | 0.504232000  |
| 27    | C             | 0.657919000  |
| 28    | F             | -0.195633000 |
| 29    | F             | -0.202671000 |
| 30    | F             | -0.207359000 |
| 31    | F             | -0.166619000 |
| 32    | F             | -0.176261000 |
| 33    | F             | -0.158357000 |
| 34    | Li            | 0.913513000  |
| 35    | C             | 0.734918000  |
| 36    | C             | 0.607980000  |
| 37    | O             | -0.692708000 |
| 38    | N S3          | -0.898415000 |
| 39    | H             | 0.452195000  |

|    |   |              |
|----|---|--------------|
| 40 | H | 0.405526000  |
| 41 | F | -0.238896000 |
| 42 | F | -0.205737000 |
| 43 | F | -0.199000000 |
| 44 | C | 0.703182000  |
| 45 | C | 0.642179000  |
| 46 | O | -0.670895000 |
| 47 | N | -0.940730000 |
| 48 | H | 0.578086000  |
| 49 | H | 0.406331000  |
| 50 | F | -0.220496000 |
| 51 | F | -0.224806000 |
| 52 | F | -0.229010000 |

**Table S3.** The Lennard Jones Parameters of Ca<sub>2</sub>C.

| <b>Ca<sub>2</sub>C atoms</b> | <b><math>\sigma/\text{nm}</math></b> | <b><math>\epsilon/\text{kJ. mol}^{-1}</math></b> | <b>Charge</b> |
|------------------------------|--------------------------------------|--------------------------------------------------|---------------|
| Ca <sub>1</sub>              | 0.302800                             | 0.996500                                         | 0.675140      |
| Ca <sub>2</sub>              | 0.302800                             | 0.996500                                         | 0.675140      |
| C                            | 0.343100                             | 0.439600                                         | -1.35028      |

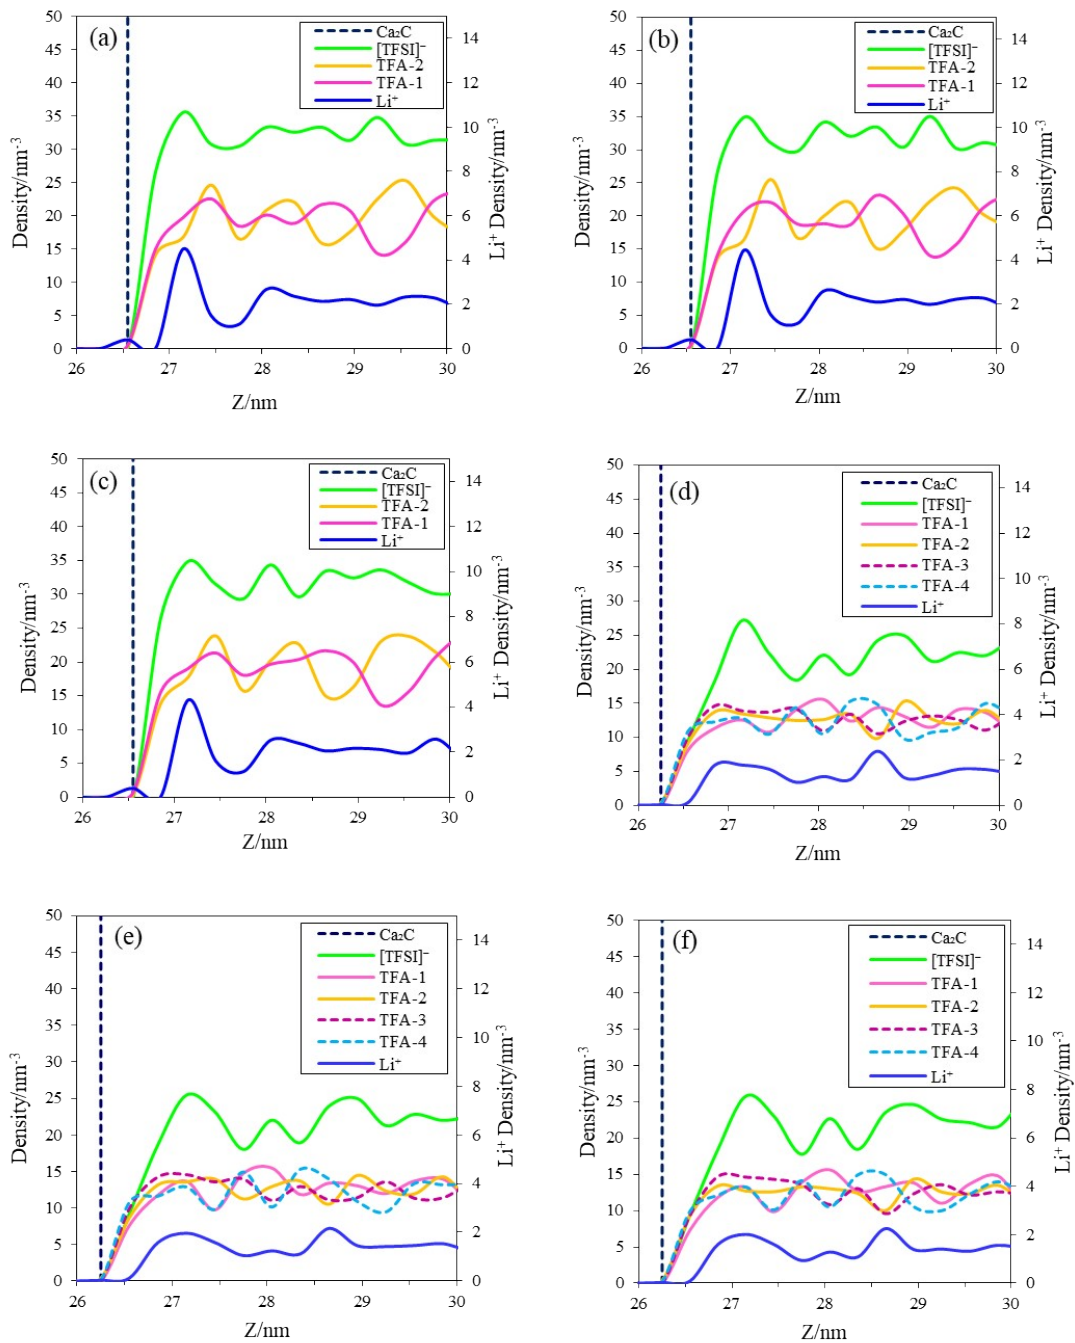

**Figure S1.** Density profiles of all species in Li[TFSI]:2TFA/ $\text{Ca}_2\text{C}$  at (a) 333.15 K, (b) 353.15 K, and (c) 373.15 K, and Li[TFSI]:4TFA/ $\text{Ca}_2\text{C}$  at (d) 333.15 K, (e) 353.15 K, and (f) 373.15 K.

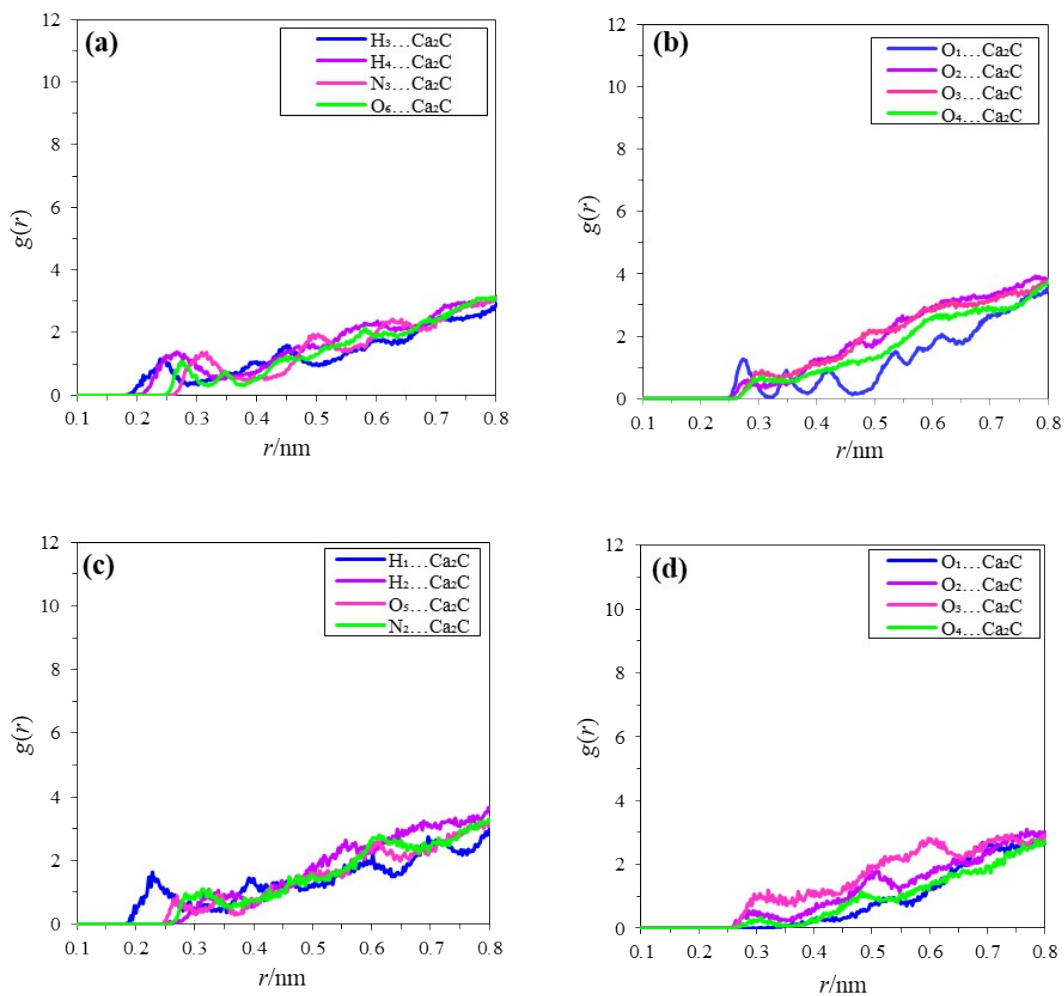

**Figure S2.** Pair correlation function between  $\text{Ca}_2\text{C}$  and (a) TFA-2 atoms of  $\text{Li}[\text{TFSI}]:2\text{TFA}$ , (b)  $[\text{TFSI}]^-$  atoms of  $\text{Li}[\text{TFSI}]:2\text{TFA}$ , (c) TFA-1 atoms of  $\text{Li}[\text{TFSI}]:4\text{TFA}$  (d)  $[\text{TFSI}]^-$  atoms of  $\text{Li}[\text{TFSI}]:4\text{TFA}$  at 298.15 K.

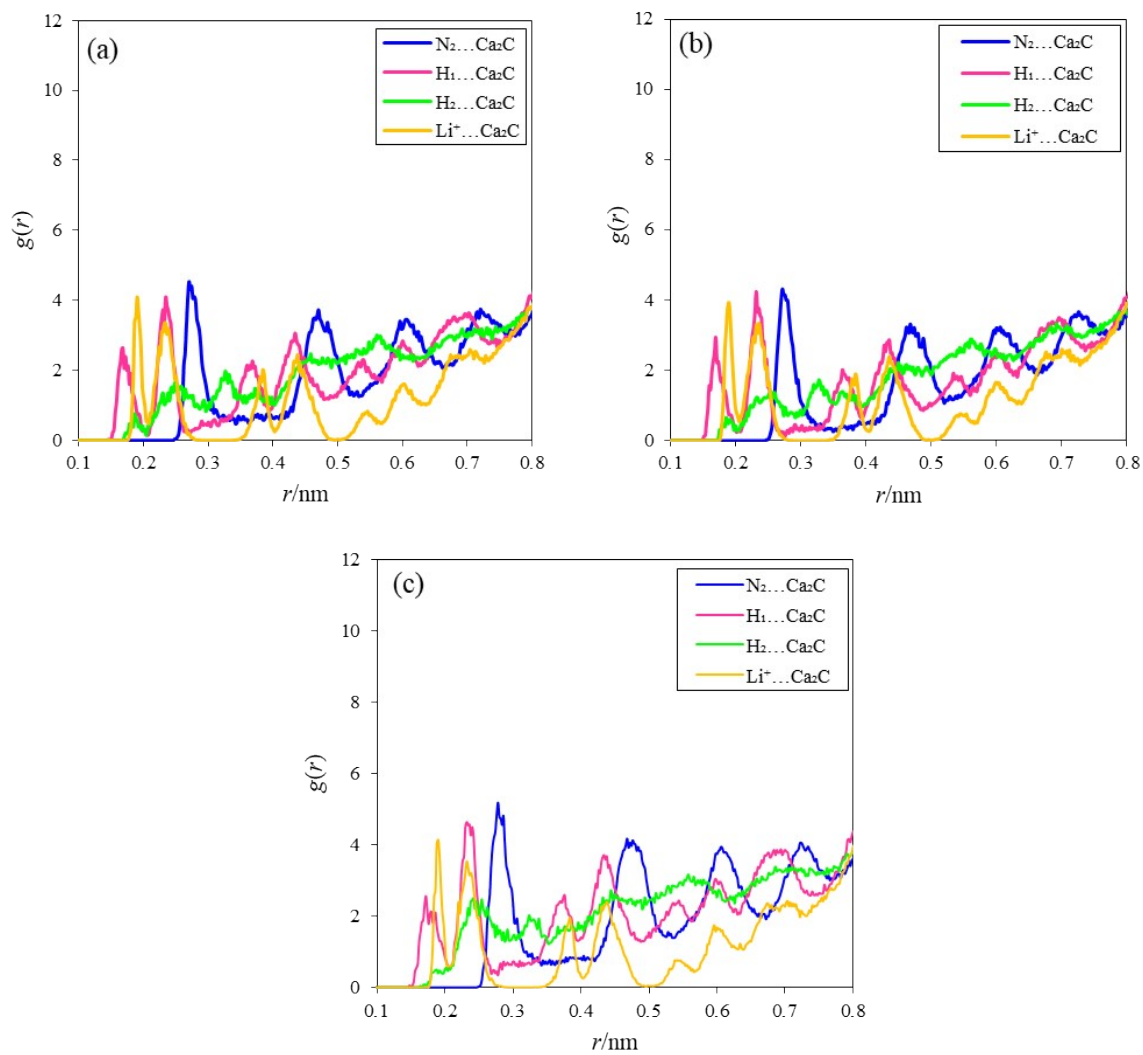

**Figure S3.** Pair correlation function between  $Ca_2C$  and TFA-1 atoms and  $Li^+$  of  $Li[TFSI]:2TFA$  at (a) 333.15 K, (b) 353.15 K, and (c) 373.15 K.

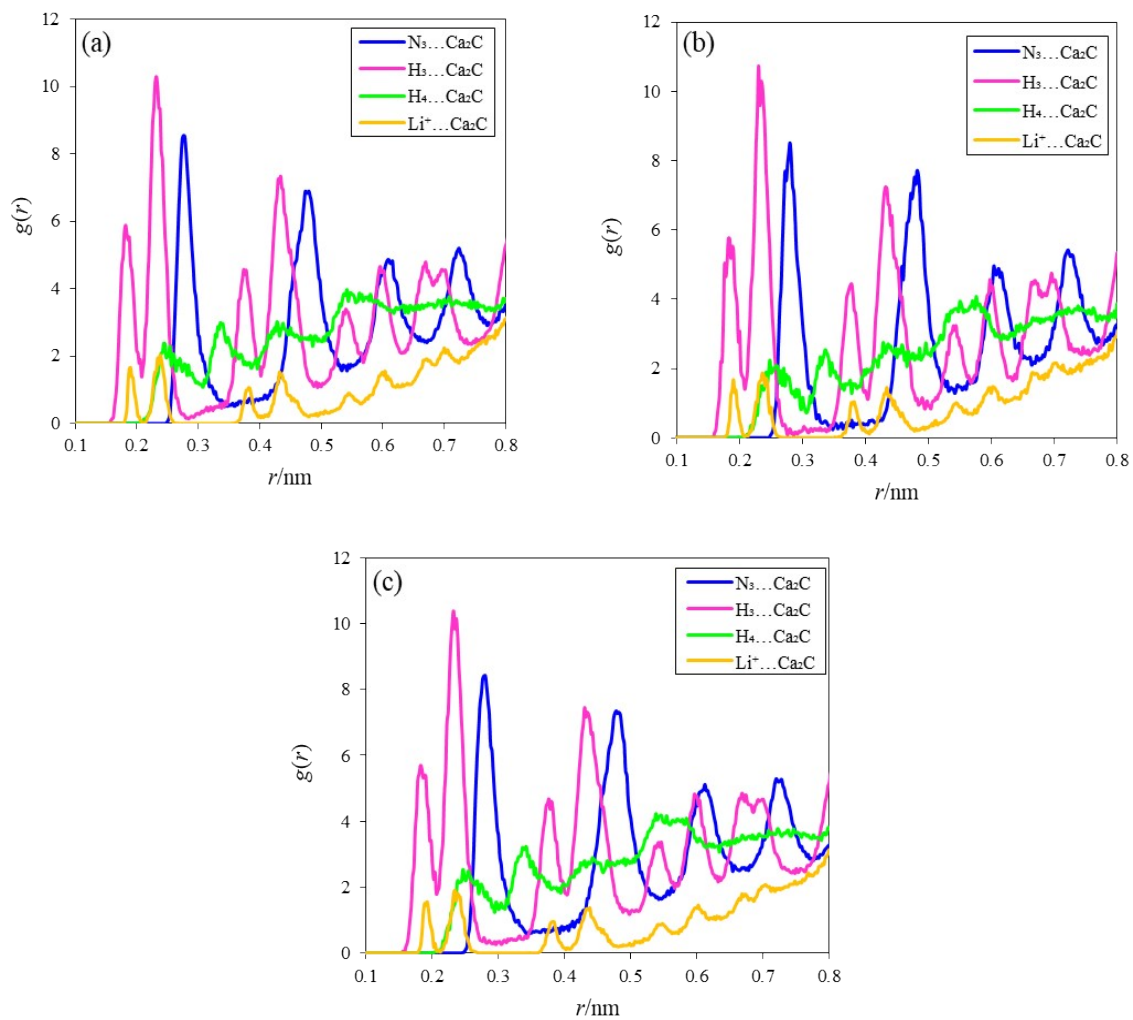

**Figure S4.** Pair correlation function between  $\text{Ca}_2\text{C}$  and TFA-2 atoms and  $\text{Li}^+$  of  $\text{Li}[\text{TFSI}]:4\text{TFA}$  at (a) 333.15 K, (b) 353.15 K, and (c) 373.15 K.



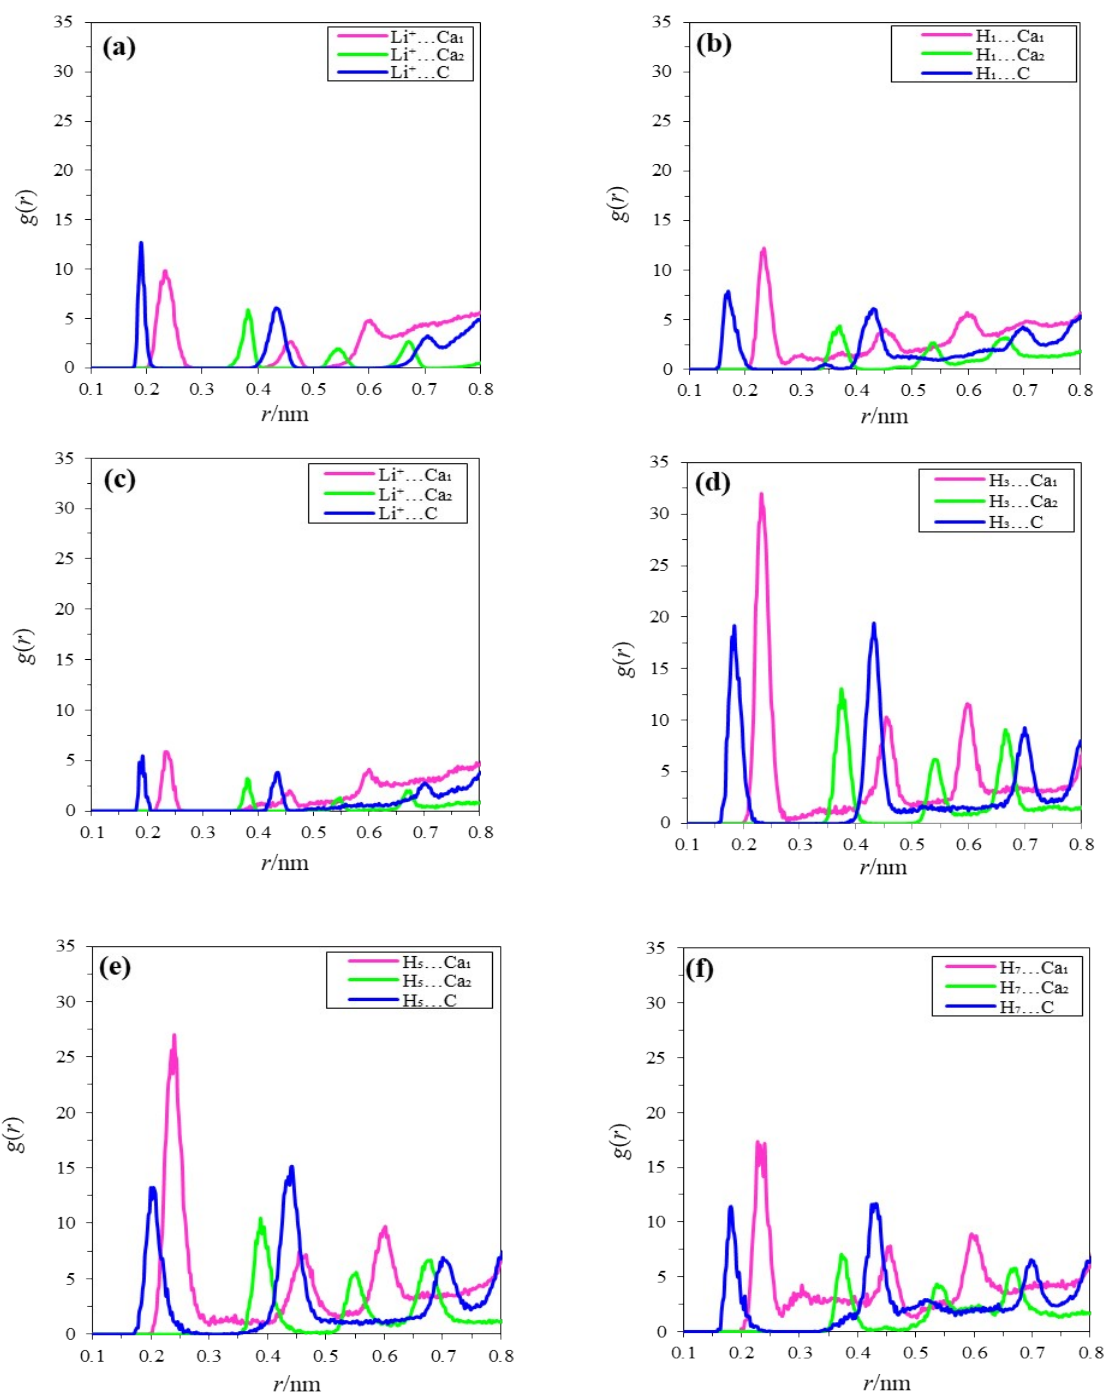

**Figure S5.** The pair correlation function between  $\text{Ca}_2\text{C}$  atoms and (a)  $\text{Li}^+$  of Li[TFSI]:2TFA, (b)  $\text{H}_1$  of Li[TFSI]:2TFA, (c)  $\text{Li}^+$  of Li[TFSI]:4TFA, (d)  $\text{H}_3$  of Li[TFSI]:4TFA, (e)  $\text{H}_5$  of Li[TFSI]:4TFA, and (f)  $\text{H}_7$  of Li[TFSI]:4TFA at 298.15 K.

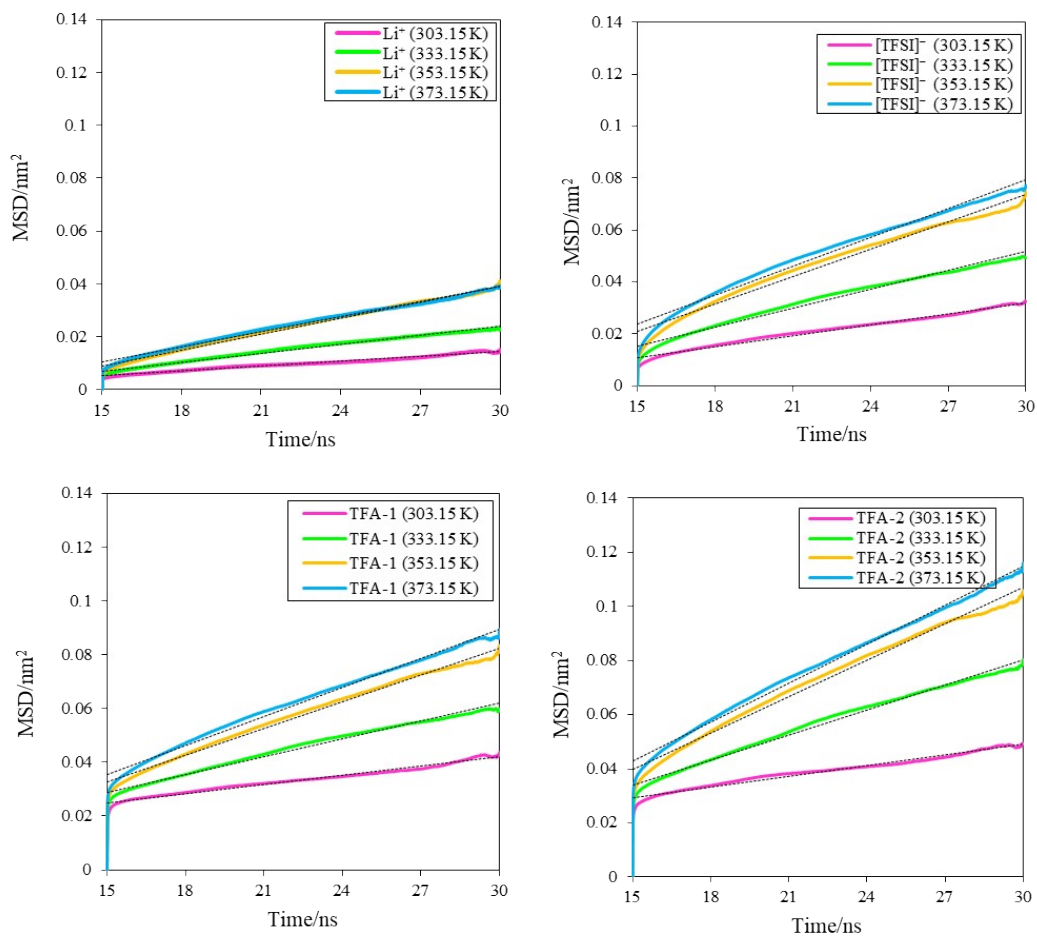

**Figure S6.** MSD curves of Li[TFSI]:2TFA particles over the last 15 ns of simulation time at 303.15 K., 333.15 K, 353.15 K, and 373.15 K.

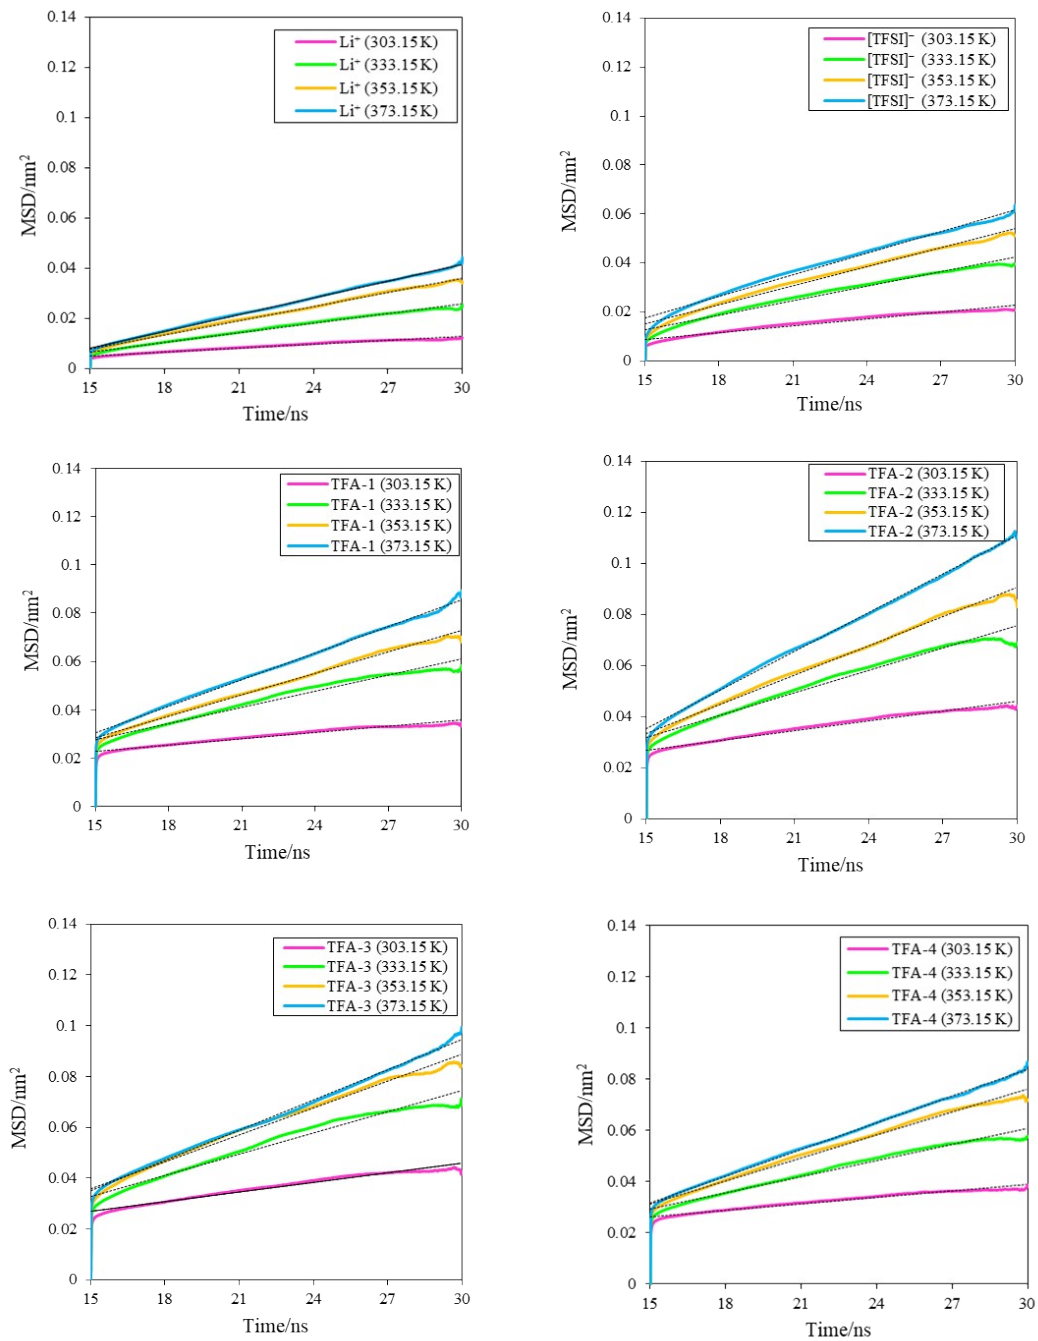

**Figure S7.** MSD curves of Li[TFSI]:4TFA particles over the last 15 ns of simulation time at 303.15 K., 333.15 K, 353.15 K, and 373.15 K.
